# Supplementary material for: A dispersive solid phase extraction adsorbent based on aptamer modified chitosan nanofibers for zearalenone separation in corn, wheat, and beer samples
Source: Royal Society of Chemistry journal article supplement (doi:10.1039/d0ay01637c), 2020-01-01
Supplement: d0ay01637c1.pdf [file d0ay01637c1.pdf]

1 **A dispersive solid phase extraction adsorbent based on aptamer modified chitosan nanofibers**  
2 **for zearalenone separation in corn, wheat, and beer samples**

3  
4 Luying Liu<sup>1,2</sup>, Yanxia Ma<sup>1</sup>, Xiaoting Zhang<sup>1</sup>, Xixiang Yang<sup>1\*</sup>, Xiaogang Hu<sup>1\*</sup>

5 <sup>1</sup> Key Laboratory of Theoretical Chemistry of Environment, Ministry of Education, Guangzhou Key  
6 Laboratory of Analytical Chemistry for Biomedicine, School of Chemistry, South China Normal  
7 University, Guangzhou, P.R. China

8 <sup>2</sup> Department of Chemistry, Guangdong University of Education, Guangzhou, P.R. China

9

10 **Running title:** Aptamer functionalized dispersive solid phase extraction

11 **\*Corresponding author:** X. G. Hu; Address: Room L2-220, School of Chemistry, South China

12 Normal University, Guangzhou Higher Education Mega Center, Guangzhou,  
13 P.R. China; E. mail: huxg@scnu.edu.cn; Tel.: +86-20-39310967; Fax.: +86-  
14 20-39310187.

15 X. X. Yang; Address: Room L2-220, School of Chemistry, South China

16 Normal University, Guangzhou Higher Education Mega Center, Guangzhou,  
17 P.R. China; E. mail: yangxx@m.scnu.edu.cn; Tel.: +86-20-39310967; Fax.:  
18 +86-20-39310187.

19 **Non-standard abbreviations:** **Apt-CNF:** aptamer modified chitosan nanofibers; **CNF:** chitosan  
20 nanofibers; **CP:** chitosan power; **dSPE:** dispersive solid phase extraction; **EDC:** 1-ethyl-3-

21 (3-dimethylaminopropyl carbodiimide; **NHS**: N-hydroxysuccinimide; **ScrApt-CNF**:  
22 scrambled aptamer modified chitosan nanofibers; **SPE**: solid phase extraction; **ZEN**:  
23 zearalenone.

24 **Keywords:** Aptamer; Chitosan nanofiber; Dispersive solid phase extraction; Zearalenone.

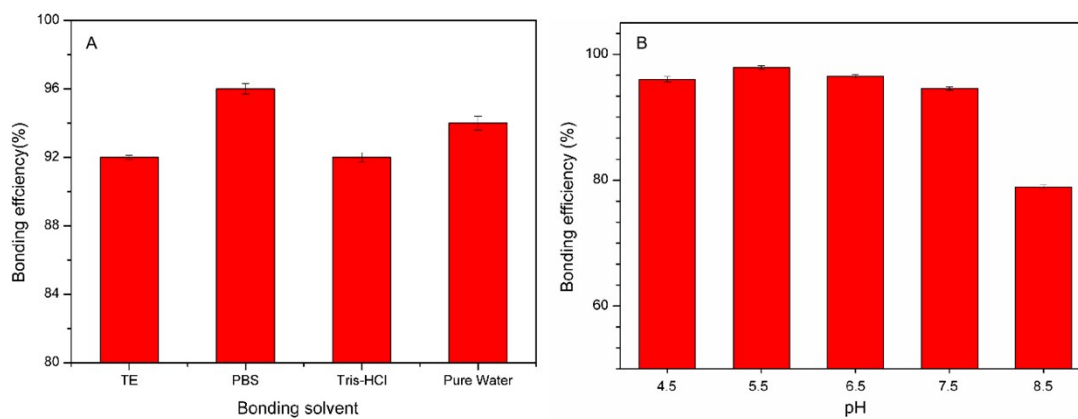

Fig S1. The effect of solvent (A) and pH (B) on the aptamer bonding efficiency.

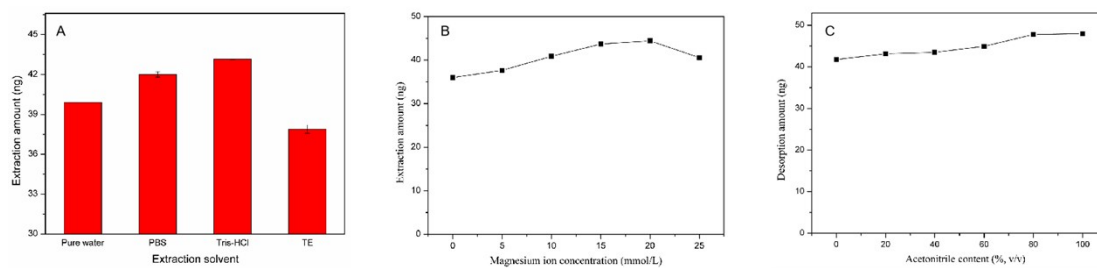

Fig S2. The effect of the dSPE conditions on performance of Apt-CNF for ZEN extraction. A: extraction solvent; B: magnesium ion concentration; C: volume ratio of acetonitrile in water.
